# Supplementary material
Source: publisher site journal article supplement (https://www.dovepress.com/article/441133)
Supplement: Supplementary file 1 [file get_supplementary_file.php]

**Supplememt table 1. lung injury scoring system**

|  |  | Score per field | |
| --- | --- | --- | --- |
| Parameter | 0 | 1 | 2 |
| A. Neutrophils in the alveolar space | none | 1-5 | >5 |
| B. Neutrophils in the interstitial space | none | 1-5 | >5 |
| C. Hyaline membranes | none | 1 | >1 |
| D. Proteinaceous debris filling the airspaces | none | 1 | >1 |
| E. Alveolar septal thickening | <2x | 2x-4x | >4x |

**Supplememt Table 2. Primary antibody information**

**Supplememt Table 3. The primer sequences utilized in this study.**

| Name | Primer sequences |
| --- | --- |
| STAT3 F | AGGAGTCTAACAACGGCAGCCT |
| STAT3 R | GTGGTACACCTCAGTCTCGAAG |
| β-actin F | CATCCGTAAAGACCTCTATGCCAAC |
| β-actin R | ATGGAGCCACCGATCCACA |
| U6 F | CTCGCTTCGGCAGCACA |
| U6 R | AACGCTTCACGAATTTGCGT |
| mmu-miRNA125b-5p-RT | GTCGTATCCAGTGCAGGGTCCGAGGTATTCGCACTGGATACGACTCACAATCACAAG |
| mmu-miRNA125b-5p-F | CGCTCCCTGAGACCCTAA |
| miRNA125b-5p-R | AGTGCAGGGTCCGAGGTATT |

**Supplememt Table 4.** **Sequence information**

| Name | Sequence |
| --- | --- |
| miR-125b-5p mimic | UCCCUGAGACCCUAACUUGUGA |
| mimics  NC | UCACAACCUCCUAGAAAGAGUAGA |
| Stat3-WT | CCTGCTTCTATTGGGAATCCCTGCCTCAGGACCTTGTGTCGAGAGGGATTGCCTT  ACAGGTTTGAACCTGCCTCAGACTACAGGCCCTCAGCAAAGCTCAGGGAGTATG  GTCCTTATTCTATGCGCTTGGTTCCCAGGGATATCTGTAACCACAGGGCAAAAGC  TGACATATACTCCAGGTCTG |
| Stat3-MT | CCTGCTTCTATTGGGAATCCCTGCCTCAGGACCTTGTGTCGAGAGGGATTGCCTT  ACAGGTTTGAACCTGCCTCAGACTACAGGCCCTCAGCAAAGTCTGAAAGGTATG  GTCCTTATTCTATGCGCTTGGTTCCCAGGGATATCTGTAACCACAGGGCAAAAGC  TGACATATACTCCAGGTCTG |


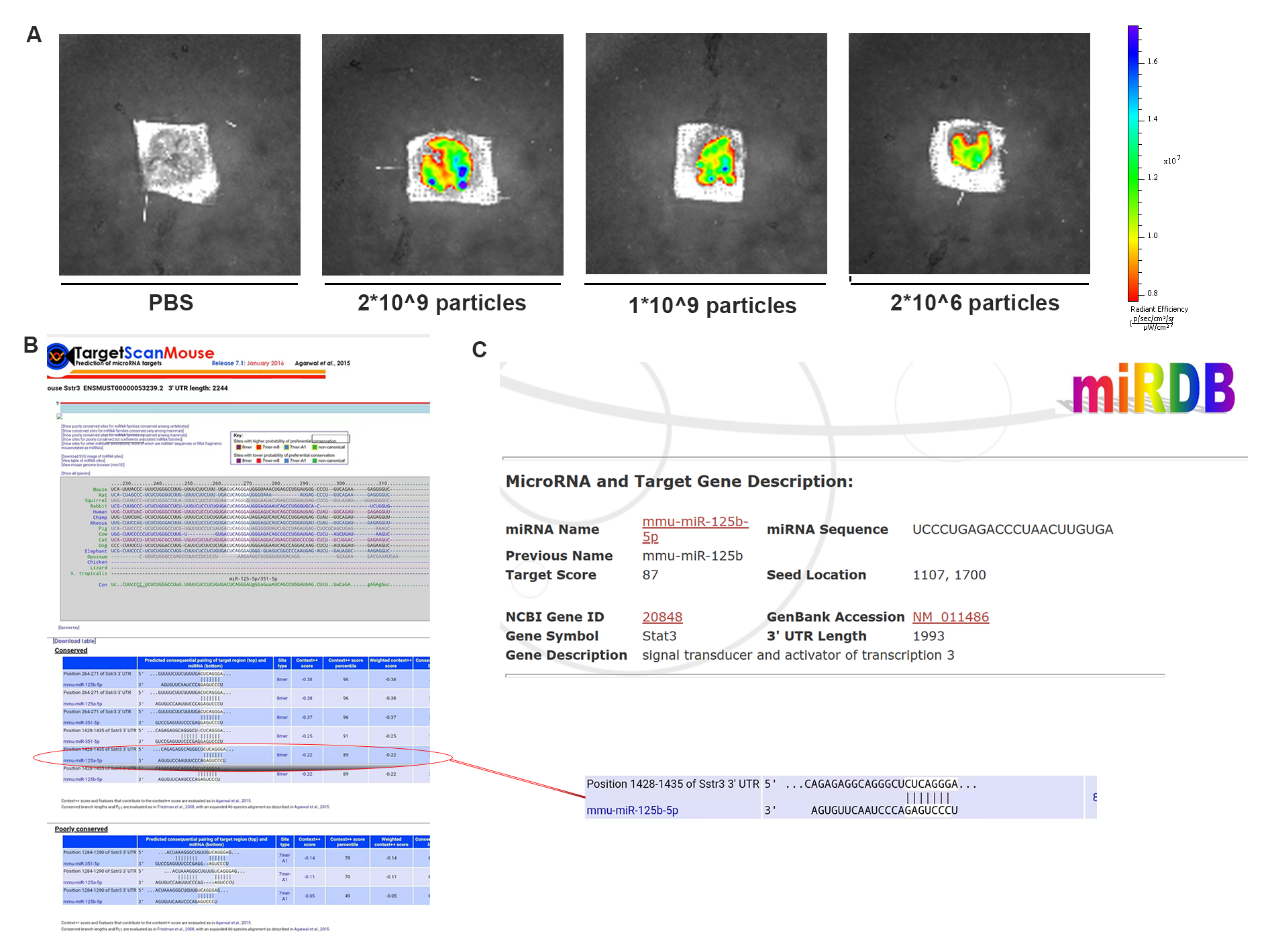
Figure S1 (A)Degree of enrichment of different amounts of BMSCs exosomes in mouse lungs: From left to right are: PBS, 2×109 particles, 1×109 particles, and 2×106particles. (B) The binding of miR-125b-5p to STAT3 predicted by TargetScan .(C) The binding of miR-125b-5p to STAT3 predicted by miRDB .


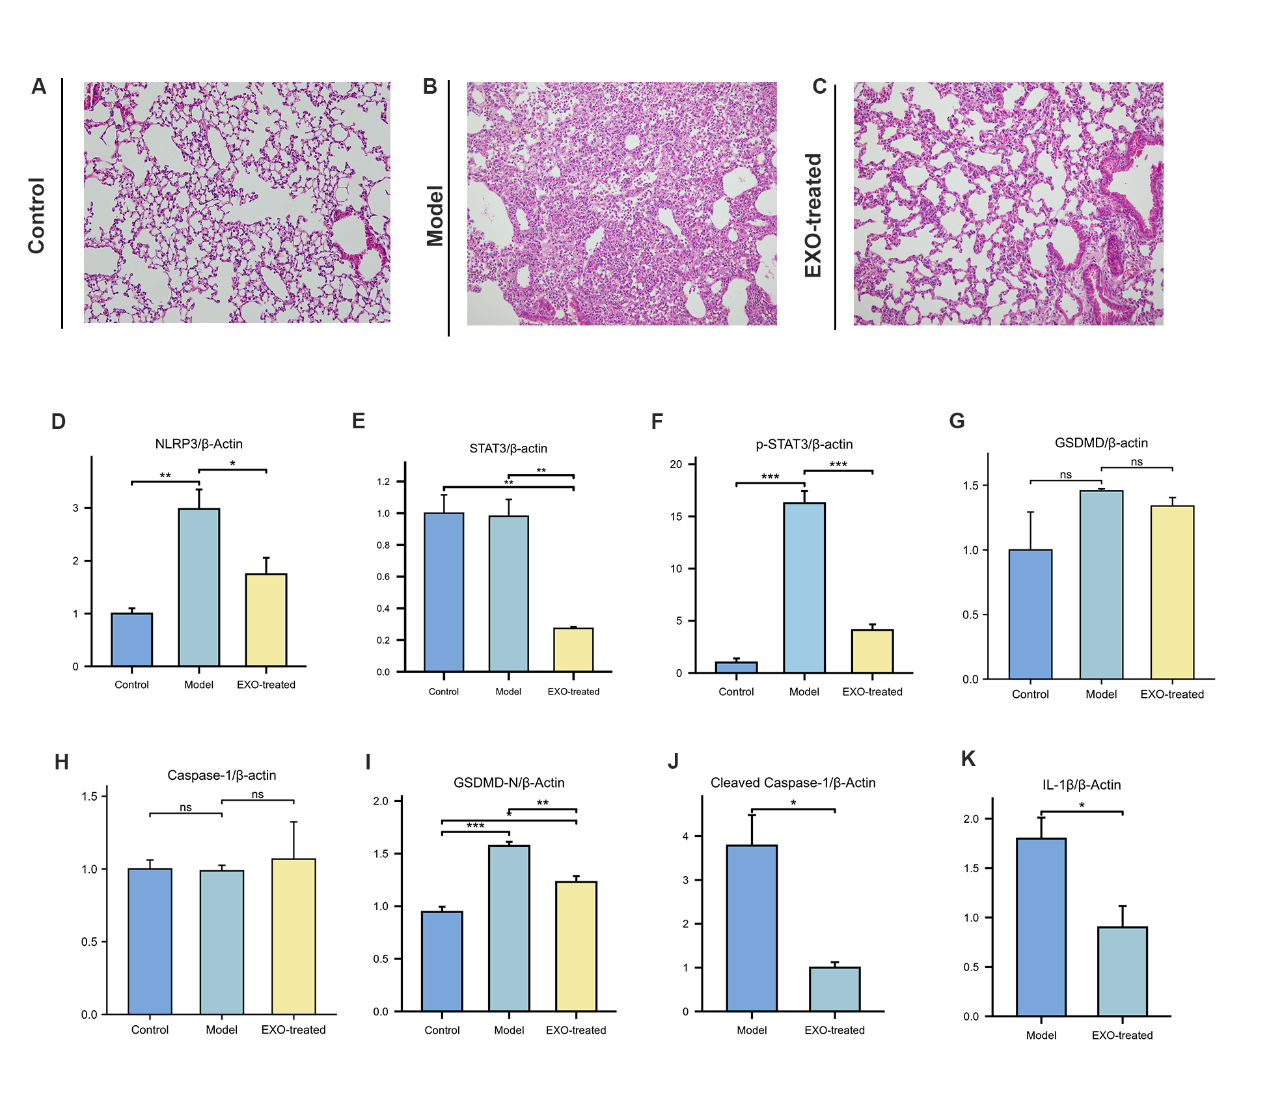


Figure S2 Mitigation of Sepsis-Induced ARDS by Alleviating Macrophage Pyroptosis with BMSC-Derived Exosomes. (A-C)Histopathological images of lung tissue(×200 magnification ).(D-K) Bar charts quantify the relative expression levels of various proteins in J774a.1 cells following different treatments. (Control,control group; Model, pyroptosis modeling group; EXO-treated, treated with exosomes following pyroptosis modeling.) Every experiment was repeated at least three times, and the data was shown as mean ± SEM (ns: no difference,*P<0.05,**P<0.01, ***P<0.001).


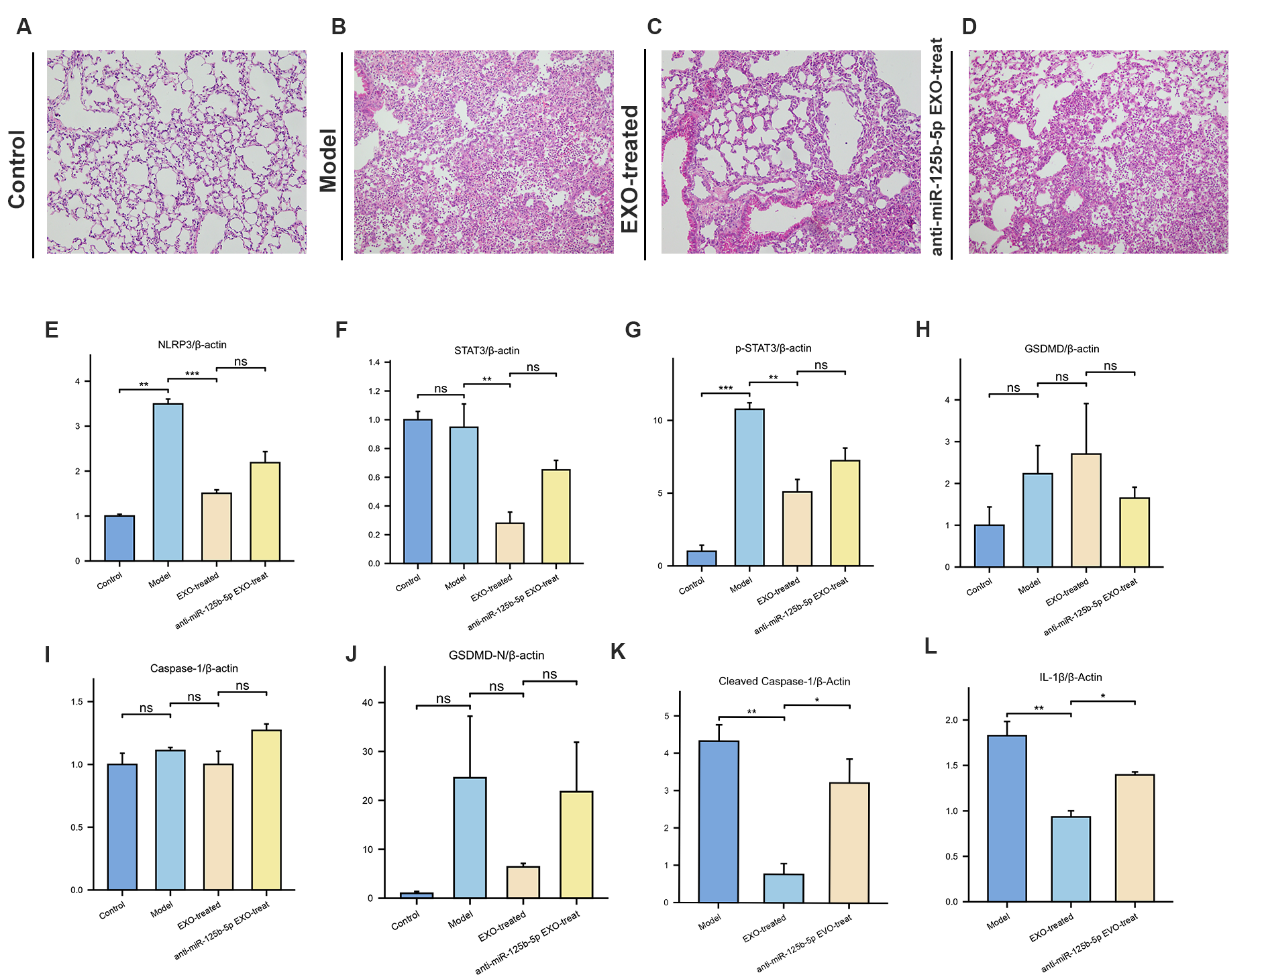


Figure S3 Alleviation of Sepsis-Induced ARDS by BMSC-Derived Exosomes via miR-125b-5p Modulation. (A-C)Histopathological images of lung tissue(×200 magnification ).(D-K) Bar charts quantify the relative expression levels of various proteins in J774a.1 cells following different treatments. (Control,control group; Model, pyroptosis modeling group; EXO-treated, treated with exosomes following pyroptosis modeling; anti-miR-125b-5p EXO-treat, following the establishment of the pyroptosis model, treatment was administered using exosomes derived from BMSCs transfected with inhibitor of miR-125b-5p.)

Every experiment was repeated at least three times, and the data was shown as mean ± SEM (ns: no difference,*P<0.05,**P<0.01, ***P<0.001)


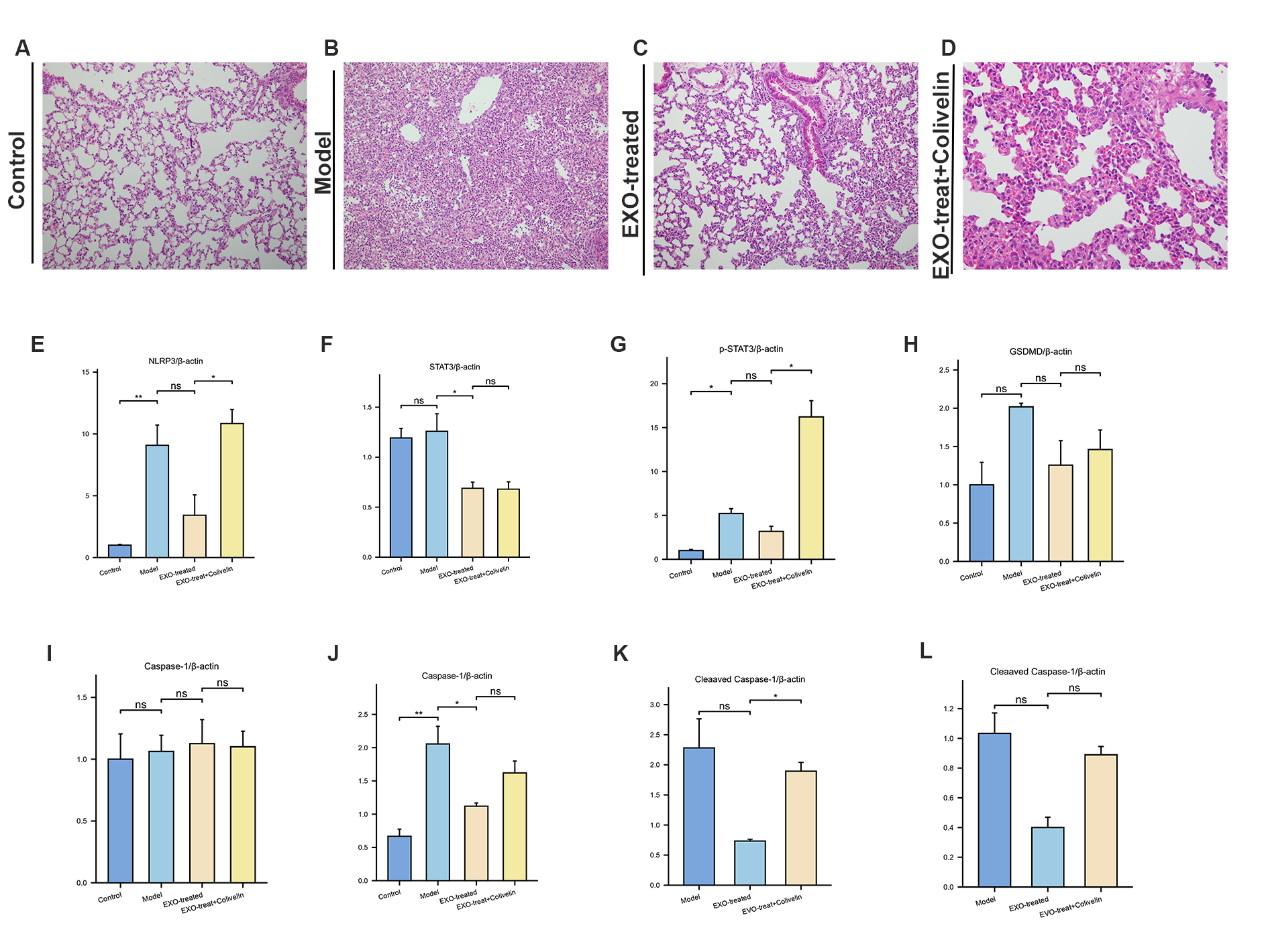


Figure S4 BMSC-Derived Exosomes Alleviate Sepsis-Induced ARDS by Modulating STAT3. (A-C)Histopathological images of lung tissue(×200 magnification ).(D-K) Bar charts quantify the relative expression levels of various proteins in J774a.1 cells following different treatments. (Control,control group; Model, pyroptosis modeling group; EXO-treated, treated with exosomes following pyroptosis modeling; EXO-treat+Colivelin, The group undergoing pyroptosis modeling concurrently with the administration of colivelin.) Every experiment was repeated at least three times, and the data was shown as mean ± SEM (ns: no difference,*P<0.05,**P<0.01, ***P<0.001).
